# Supplementary material for: Pilot Screening of Cell-Free mtDNA in NIPT: Quality Control, Variant Calling, and Haplogroup Determination
Source: MDPI journal article supplement (doi:10.3390/genes12050743), 2021-05-14
Supplement: s1 [file s1]

Article

# Pilot Screening of Cell-Free mtDNA in NIPT: Quality Control, Variant Calling and Haplogroup Determination

Alisa Morshneva<sup>1,2\*</sup>, Polina Kozyulina<sup>1,2</sup>, Elena Vashukova<sup>1,2</sup>, Olga Tarasenko<sup>1,2</sup>, Natalia Dvoynova<sup>2</sup>, Anastasia Chentsova<sup>2</sup>, Olga Talantova<sup>1</sup>, Alexander Koroteev<sup>3,4</sup>, Dmitrii Ivanov<sup>3</sup>, Elena Serebryakova<sup>1</sup>, Tatyana Ivashchenko<sup>1</sup>, Aitalina Sukhomyasova<sup>5,6</sup>, Nadezhda Maksimova<sup>6</sup>, Olesya Beshpalova<sup>1</sup>, Igor Kogan<sup>1</sup>, Vladislav Baranov<sup>1</sup> and Andrey Glotov<sup>1,2</sup>

## Supplementary Materials

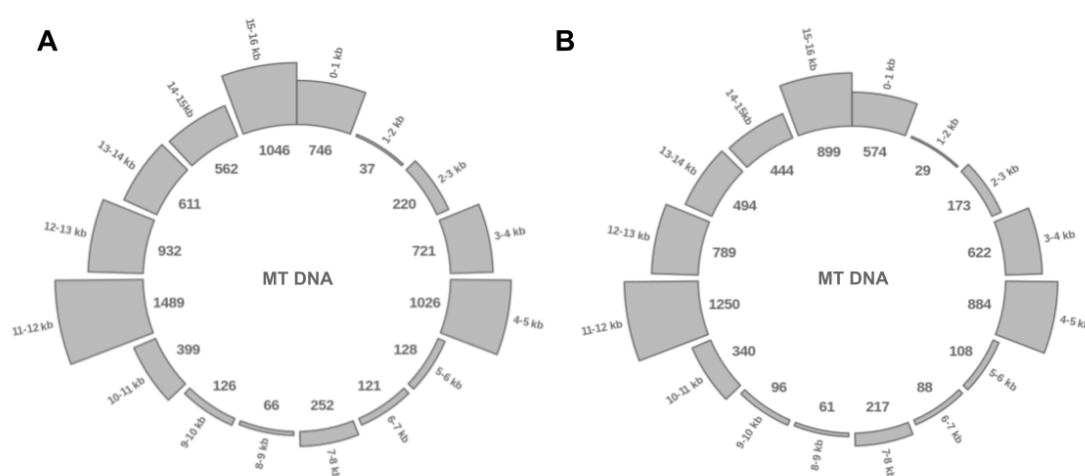

**Figure S1.** Distribution of variants throughout the mitochondrial genome before (A) and after (B) filtering of homopolymers. Figures outside the circle mark position in the mitochondrial genome (16kb mtDNA has been divided into 16 sections per 1kb), figures in the inner circle represent the number of variants in every section.
